# Supplementary material for: HCG supplement did not accelerate tunica albuginea remodeling to facilitate penile growth
Source: PubMed Central journal article supplement (PMC10545796; doi:10.1038/s41598-023-38888-y), 2023-10-02

Raw data for WB analysis of AR, eNOS, and aSMA

2022.04.29

AR

| A       | B        | C   | D    | E             | F        | G                 |
|---------|----------|-----|------|---------------|----------|-------------------|
| Control | Anti-LOX | HCG | -300 | -300+Anti-LOX | -300+HCG | -300+Anti-LOX+HCG |

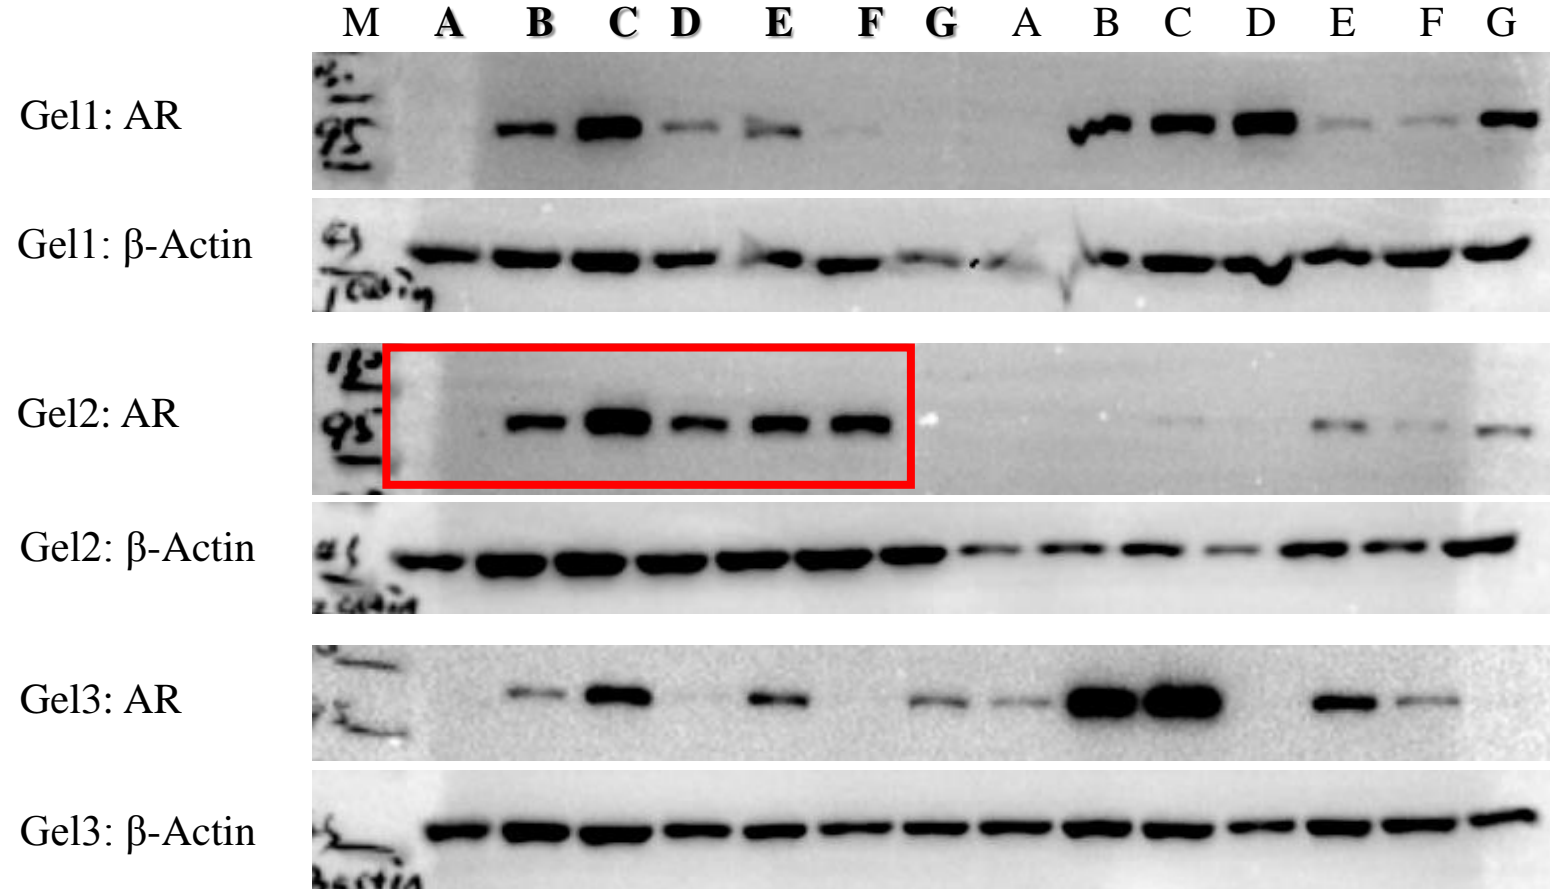

2022.05.31

# eNOS

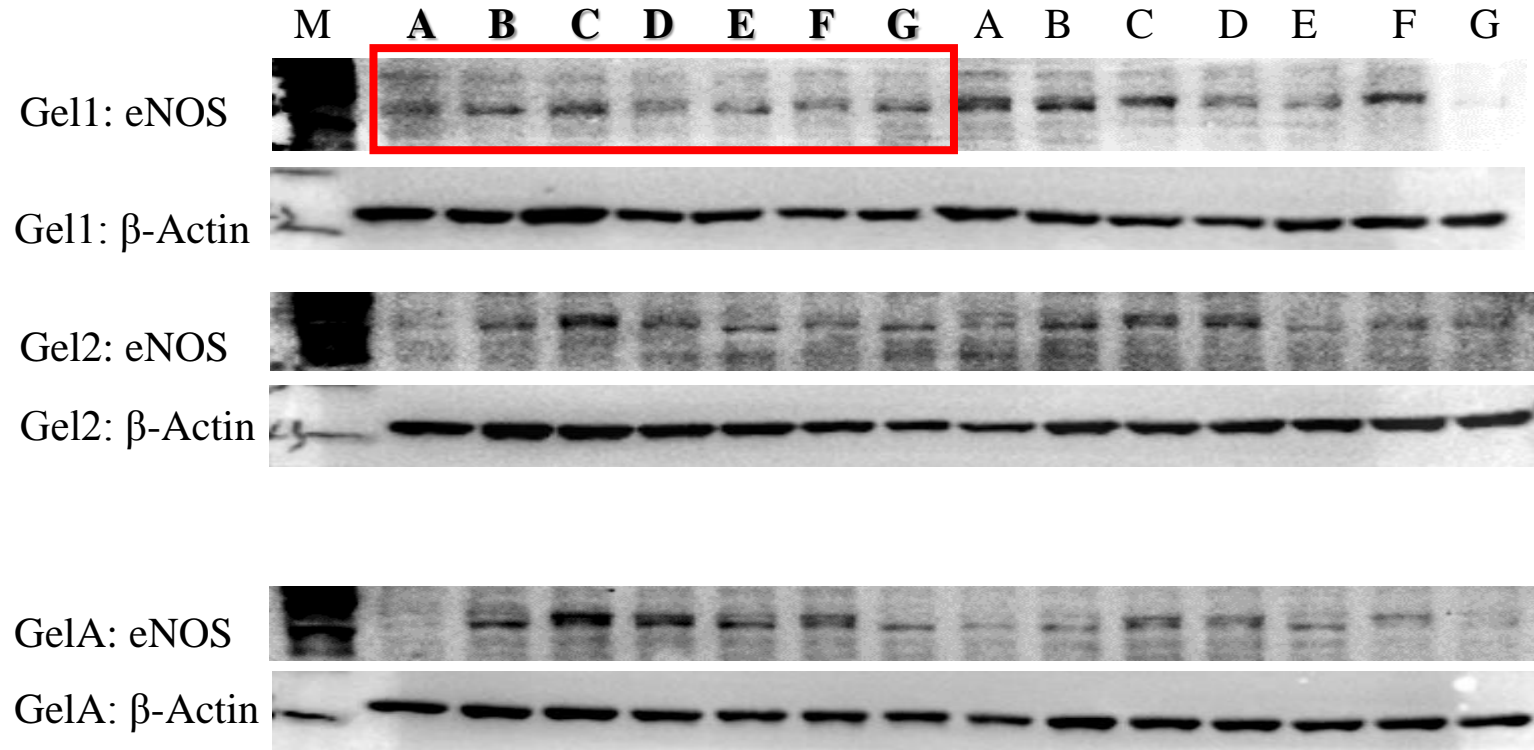

2022.05.06

$\alpha$ -SMA

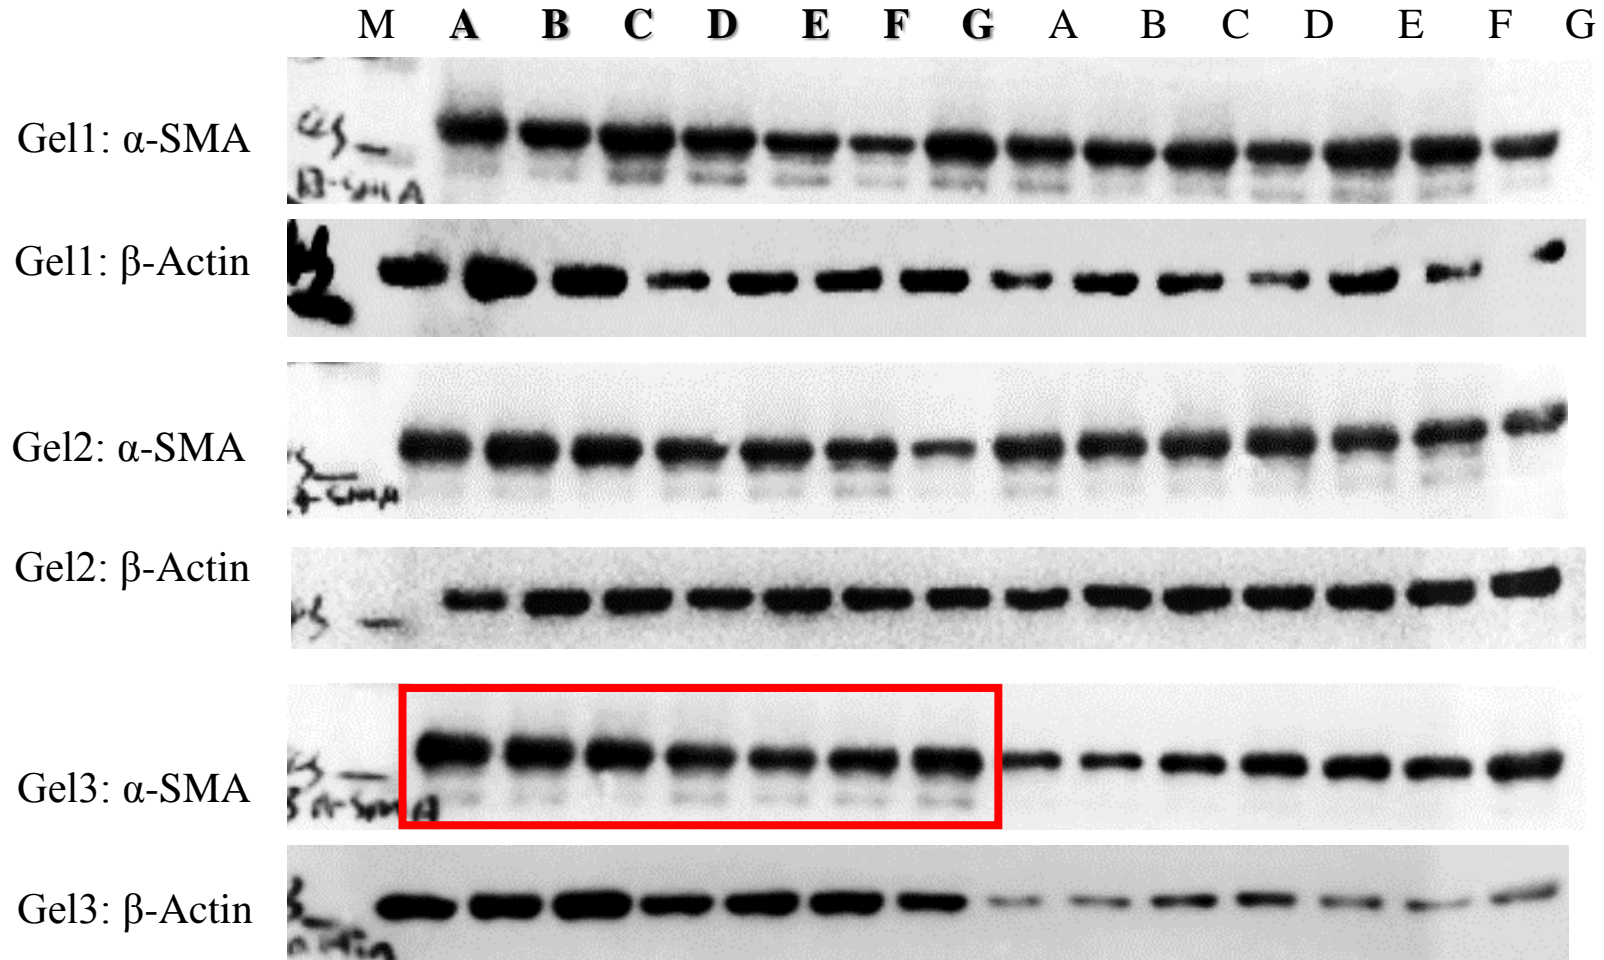

Supplement: 41598_2023_38888_MOESM2_ESM.pdf [file 41598_2023_38888_MOESM2_ESM.pdf]
